# Supplementary material for: The electronic structure of nitrilimine: absence of the carbenic form
Source: Royal Society of Chemistry journal article supplement (doi:10.1039/b517030c), 2006-01-01
Supplement: b517030c.pdf [file b517030c.pdf]

# Supplementary Material (ESI) for Chemical Communications  
# This journal is (c) The Royal Society of Chemistry 2006

## **Supplementary Material**

to the manuscript

**The electronic structure of nitrilimine: absence of the carbenic form**

by

Fausto Cargnoni, Giorgio Molteni, David L. Cooper, Mario Raimondi, and  
Alessandro Ponti

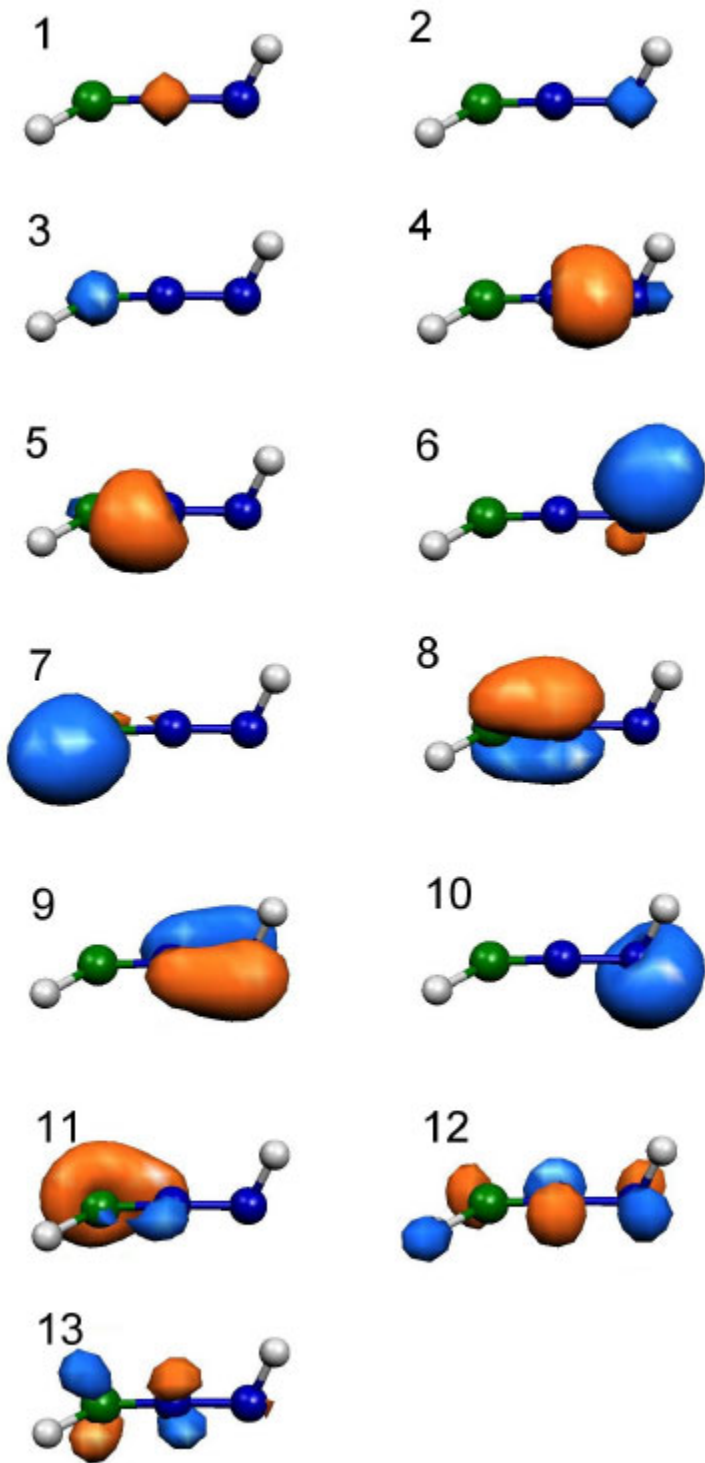

Hartree-Fock occupied MOs of HCNNH, localised after Pipek and Mezey, along with the two lowest virtual MOs (not localised).

Basis set: cc-pVTZ

Geometry: CASSCF(8|6)/cc-pVTZ

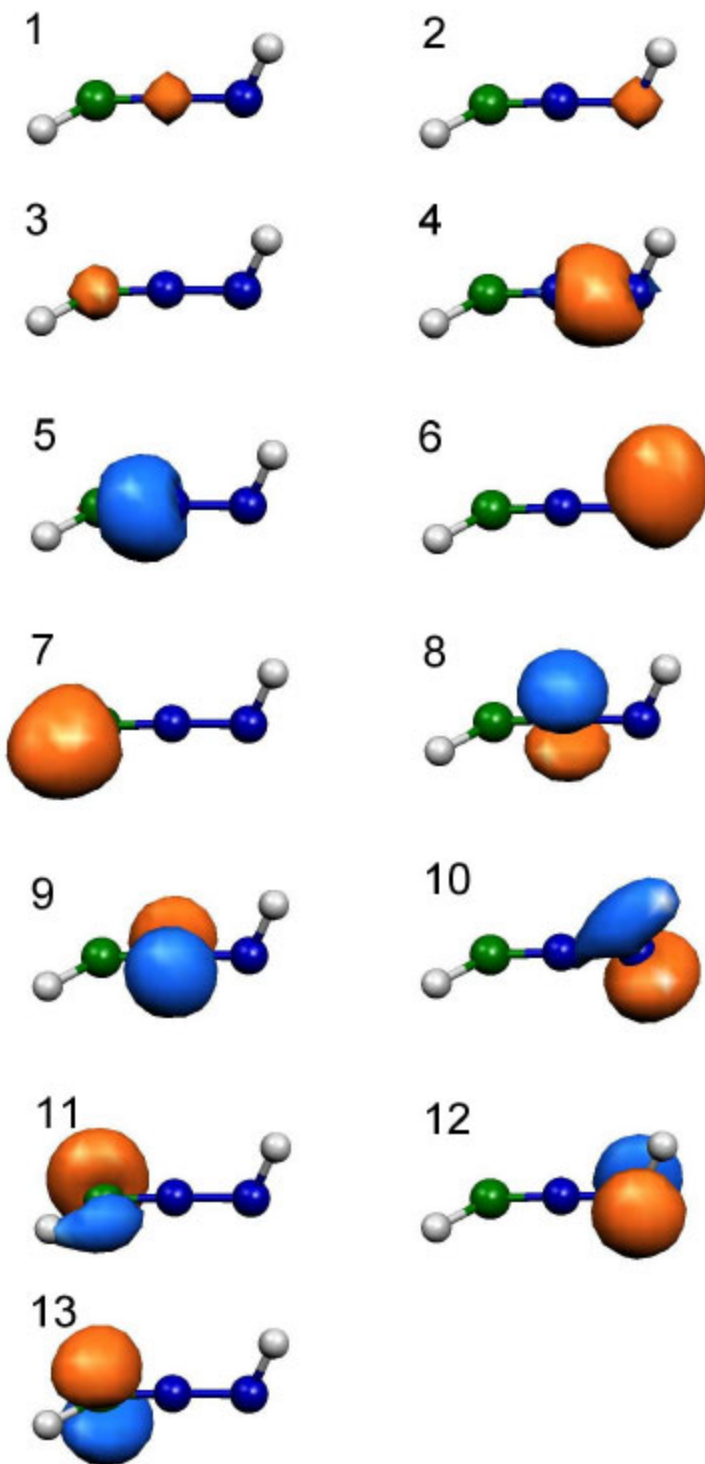

CASSCF(8|6) frozen (1-7, doubly occupied) and active (8-13, partially occupied) MOs of HCNNH, localised after Pipek and Mezey.

Basis set: cc-pVTZ  
 Geometry: CASSCF(8|6)/cc-pVTZ

Note the atomic nature of the localised  $\pi$  molecular orbitals (8-13).

## SC(8) calculation using localised HF MOs as starting orbitals

HF energy            -147.8491272 hartree  
SC(8) energy        -147.9332404 hartree  
Correlation energy   84.1 millihartree

SC(8) ORBITALS

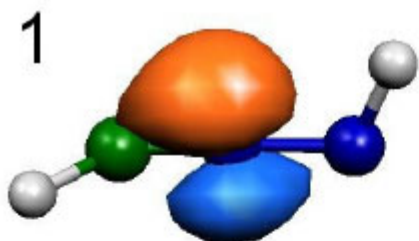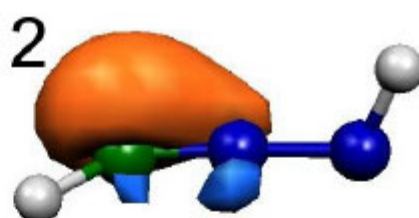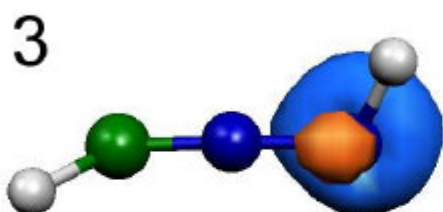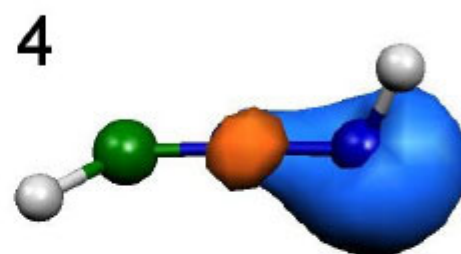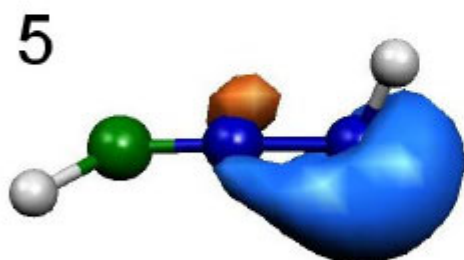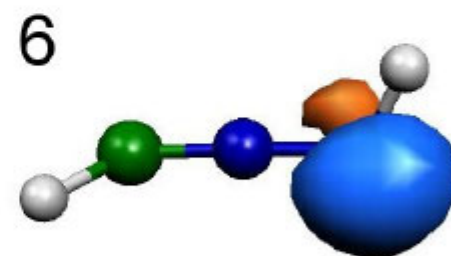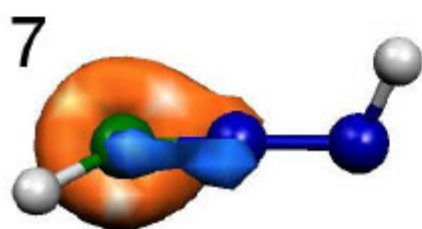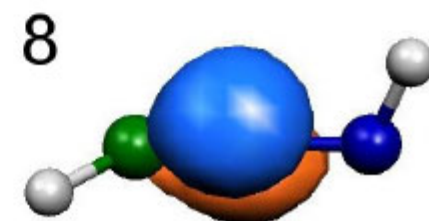

### RUMER structures

1 ==> 1- 2 3- 4 5- 6 7- 8  
2 ==> 2- 3 1- 4 5- 6 7- 8  
3 ==> 1- 2 4- 5 3- 6 7- 8  
4 ==> 2- 3 4- 5 1- 6 7- 8  
5 ==> 3- 4 2- 5 1- 6 7- 8  
6 ==> 1- 2 3- 4 6- 7 5- 8  
7 ==> 2- 3 1- 4 6- 7 5- 8  
8 ==> 1- 2 4- 5 6- 7 3- 8  
9 ==> 2- 3 4- 5 6- 7 1- 8  
10 ==> 3- 4 2- 5 6- 7 1- 8  
11 ==> 1- 2 5- 6 4- 7 3- 8  
12 ==> 2- 3 5- 6 4- 7 1- 8  
13 ==> 3- 4 5- 6 2- 7 1- 8  
14 ==> 4- 5 3- 6 2- 7 1- 8

### OVERLAP matrix

|   | 1        | 2        | 3        | 4        | 5        | 6        | 7        | 8        |
|---|----------|----------|----------|----------|----------|----------|----------|----------|
| 1 | 1.00000  | 0.54071  | 0.08510  | 0.15291  | 0.30365  | 0.15795  | 0.12010  | -0.59366 |
| 2 | 0.54071  | 1.00000  | -0.10065 | -0.09508 | 0.01531  | 0.11213  | 0.66013  | 0.09538  |
| 3 | 0.08510  | -0.10065 | 1.00000  | 0.73673  | 0.42598  | -0.13536 | -0.04297 | -0.23098 |
| 4 | 0.15291  | -0.09508 | 0.73673  | 1.00000  | 0.70735  | 0.40230  | 0.02590  | -0.36292 |
| 5 | 0.30365  | 0.01531  | 0.42598  | 0.70735  | 1.00000  | 0.72926  | 0.10565  | -0.06184 |
| 6 | 0.15795  | 0.11213  | -0.13536 | 0.40230  | 0.72926  | 1.00000  | 0.16579  | 0.05405  |
| 7 | 0.12010  | 0.66013  | -0.04297 | 0.02590  | 0.10565  | 0.16579  | 1.00000  | 0.48266  |
| 8 | -0.59366 | 0.09538  | -0.23098 | -0.36292 | -0.06184 | 0.05405  | 0.48266  | 1.00000  |

### SPIN COUPLING COEFFICIENTS - RUMER BASIS

1 ==> 0.266608  
2 ==> 0.018936  
3 ==> -0.024789  
4 ==> -0.023314  
5 ==> 0.008506  
6 ==> 0.023620  
7 ==> -0.025562  
8 ==> -0.024126  
9 ==> 0.044258  
10 ==> -0.024582  
11 ==> 0.002560  
12 ==> -0.017285  
13 ==> -0.057456  
14 ==> -0.001669

### CHIRGWIN-COULSON occupation numbers

Chirgwin-Coulson occupation number for structure 1 is 1.40148  
Chirgwin-Coulson occupation number for structure 2 is 0.04920  
Chirgwin-Coulson occupation number for structure 3 is -0.09314  
Chirgwin-Coulson occupation number for structure 4 is -0.04229  
Chirgwin-Coulson occupation number for structure 5 is 0.02126  
Chirgwin-Coulson occupation number for structure 6 is 0.06297  
Chirgwin-Coulson occupation number for structure 7 is -0.03847  
Chirgwin-Coulson occupation number for structure 8 is -0.04131  
Chirgwin-Coulson occupation number for structure 9 is 0.07445  
Chirgwin-Coulson occupation number for structure 10 is -0.06141  
Chirgwin-Coulson occupation number for structure 11 is 0.00588  
Chirgwin-Coulson occupation number for structure 12 is -0.04016  
Chirgwin-Coulson occupation number for structure 13 is -0.29247  
Chirgwin-Coulson occupation number for structure 14 is -0.00599

### Expectation values of $(s(i)+s(j))^2$

Lower triangle uses SPIN function with Snorm=0.916976

Upper triangle uses FULL function with Snorm=1.000000

|   | 1       | 2        | 3       | 4        | 5       | 6        | 7       | 8        |
|---|---------|----------|---------|----------|---------|----------|---------|----------|
| 1 | 0.00000 | -0.32250 | 1.46904 | 1.51978  | 1.45762 | 1.55060  | 1.94992 | 1.37555  |
| 2 | 0.13496 | 0.00000  | 1.50809 | 1.49081  | 1.55260 | 1.44870  | 1.37463 | 1.94768  |
| 3 | 1.49150 | 1.51173  | 0.00000 | -0.06970 | 1.63440 | 1.43998  | 1.40141 | 1.61678  |
| 4 | 1.50103 | 1.48245  | 0.05250 | 0.00000  | 1.43972 | 1.63486  | 1.59914 | 1.38539  |
| 5 | 1.47370 | 1.51435  | 1.23485 | 1.72474  | 0.00000 | -0.07320 | 1.49431 | 1.49455  |
| 6 | 1.51974 | 1.47990  | 1.72605 | 1.23683  | 0.05137 | 0.00000  | 1.49981 | 1.49926  |
| 7 | 1.02282 | 1.85462  | 1.45569 | 1.53924  | 1.49267 | 1.49925  | 0.00000 | -0.31921 |
| 8 | 1.85624 | 1.02199  | 1.52768 | 1.46320  | 1.50832 | 1.48685  | 0.13572 | 0.00000  |

### SPIN COUPLING COEFFICIENTS - KOTANI BASIS

1 ==> -0.0009  
2 ==> -0.1648  
3 ==> 0.0814  
4 ==> -0.0180  
5 ==> 0.0863  
6 ==> -0.0869  
7 ==> 0.0165  
8 ==> -0.0211  
9 ==> 0.0019  
10 ==> -0.0146  
11 ==> -0.0058  
12 ==> -0.1113  
13 ==> 0.0028  
14 ==> 0.8422

KOTANI Populations, i .e,

### OCCUPATION NUMBERS THAT NORMALIZE THE TOTAL SPIN FUNCTIONS

1 ==> 0.0000  
2 ==> 0.0352  
3 ==> 0.0086  
4 ==> 0.0004  
5 ==> 0.0096  
6 ==> 0.0098  
7 ==> 0.0004  
8 ==> 0.0006  
9 ==> 0.0000  
10 ==> 0.0003  
11 ==> 0.0000  
12 ==> 0.0161  
13 ==> 0.0000  
14 ==> 0.9191

**SC(8) calculation using localised HF MOs as starting orbitals under the following constraint: SC orbitals 5 and 6 (see figure below) are not allowed to mix with the ninth orbital of the localised HF guess (see first figure of this Supplementary Material)**

HF energy                -147.8491272  
SC(8) energy            -147.9308781  
Correlation energy    81.8 millihartrees

ORBITALS

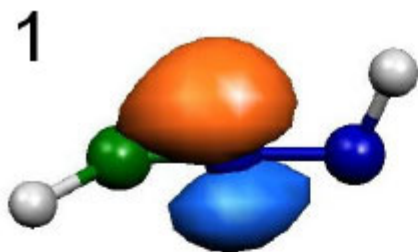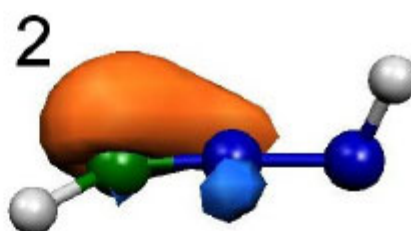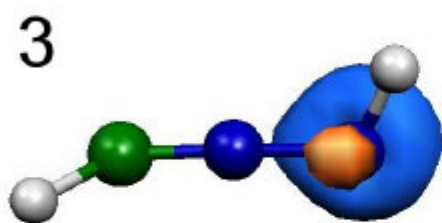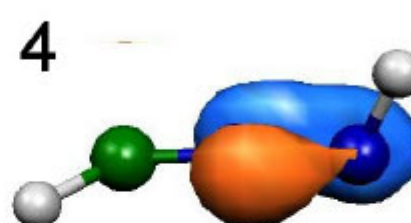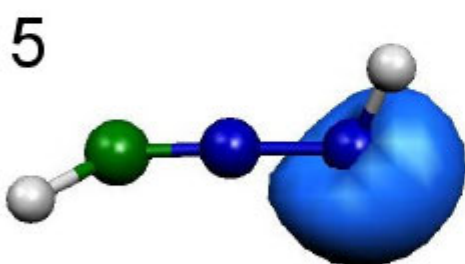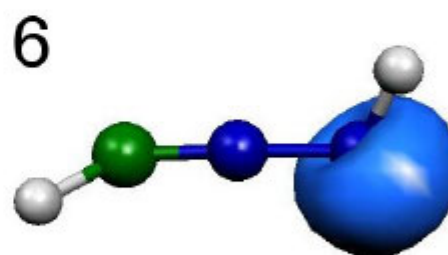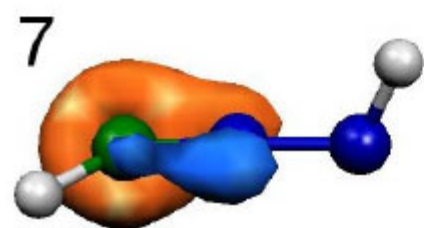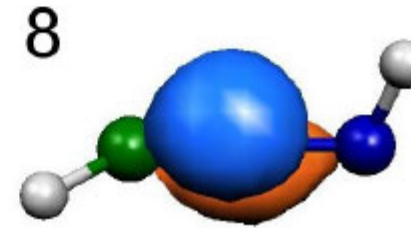

### RUMER structures

1 ==> 1- 2 3- 4 5- 6 7- 8  
2 ==> 2- 3 1- 4 5- 6 7- 8  
3 ==> 1- 2 4- 5 3- 6 7- 8  
4 ==> 2- 3 4- 5 1- 6 7- 8  
5 ==> 3- 4 2- 5 1- 6 7- 8  
6 ==> 1- 2 3- 4 6- 7 5- 8  
7 ==> 2- 3 1- 4 6- 7 5- 8  
8 ==> 1- 2 4- 5 6- 7 3- 8  
9 ==> 2- 3 4- 5 6- 7 1- 8  
10 ==> 3- 4 2- 5 6- 7 1- 8  
11 ==> 1- 2 5- 6 4- 7 3- 8  
12 ==> 2- 3 5- 6 4- 7 1- 8  
13 ==> 3- 4 5- 6 2- 7 1- 8  
14 ==> 4- 5 3- 6 2- 7 1- 8

### OVERLAP matrix

|   | 1        | 2        | 3        | 4        | 5        | 6        | 7        | 8        |
|---|----------|----------|----------|----------|----------|----------|----------|----------|
| 1 | 1.00000  | 0.48898  | 0.07535  | -0.08247 | 0.20664  | 0.16638  | 0.15163  | -0.55474 |
| 2 | 0.48898  | 1.00000  | -0.36222 | -0.32480 | -0.28511 | -0.17387 | 0.73918  | 0.24271  |
| 3 | 0.07535  | -0.36222 | 1.00000  | 0.76515  | 0.68445  | 0.62198  | -0.29895 | -0.36132 |
| 4 | -0.08247 | -0.32480 | 0.76515  | 1.00000  | 0.34159  | 0.42809  | -0.24734 | -0.48875 |
| 5 | 0.20664  | -0.28511 | 0.68445  | 0.34159  | 1.00000  | 0.89738  | -0.19794 | -0.25961 |
| 6 | 0.16638  | -0.17387 | 0.62198  | 0.42809  | 0.89738  | 1.00000  | -0.11567 | -0.23668 |
| 7 | 0.15163  | 0.73918  | -0.29895 | -0.24734 | -0.19794 | -0.11567 | 1.00000  | 0.53910  |
| 8 | -0.55474 | 0.24271  | -0.36132 | -0.48875 | -0.25961 | -0.23668 | 0.53910  | 1.00000  |

### SPIN COUPLING COEFFICIENTS - RUMER BASIS

1 ==> 0.304270  
2 ==> 0.006478  
3 ==> 0.034649  
4 ==> -0.019721  
5 ==> -0.008664  
6 ==> 0.021476  
7 ==> -0.024611  
8 ==> -0.014210  
9 ==> 0.039724  
10 ==> -0.014976  
11 ==> 0.009477  
12 ==> -0.010409  
13 ==> -0.067764  
14 ==> -0.017884

### CHIRGWIN-COULSON occupation numbers

Chirgwin-Coulson occupation number for structure 1 is 1.26696  
Chirgwin-Coulson occupation number for structure 2 is 0.01371  
Chirgwin-Coulson occupation number for structure 3 is 0.07080  
Chirgwin-Coulson occupation number for structure 4 is -0.02073  
Chirgwin-Coulson occupation number for structure 5 is -0.01823  
Chirgwin-Coulson occupation number for structure 6 is 0.04476  
Chirgwin-Coulson occupation number for structure 7 is -0.02589  
Chirgwin-Coulson occupation number for structure 8 is -0.01325  
Chirgwin-Coulson occupation number for structure 9 is 0.04011  
Chirgwin-Coulson occupation number for structure 10 is -0.03209  
Chirgwin-Coulson occupation number for structure 11 is 0.01795  
Chirgwin-Coulson occupation number for structure 12 is -0.02103  
Chirgwin-Coulson occupation number for structure 13 is -0.28602  
Chirgwin-Coulson occupation number for structure 14 is -0.03706



### Expectation values of $(s(i)+s(j))^2$

Lower triangle uses SPIN function with Snorm=0.916976

Upper triangle uses FULL function with Snorm=1.000000

|   | 1       | 2        | 3       | 4        | 5       | 6        | 7       | 8        |
|---|---------|----------|---------|----------|---------|----------|---------|----------|
| 1 | 0.00000 | -0.34117 | 1.47921 | 1.51993  | 1.46080 | 1.53976  | 2.02596 | 1.31551  |
| 2 | 0.12518 | 0.00000  | 1.49926 | 1.50366  | 1.53246 | 1.46775  | 1.31389 | 2.02415  |
| 3 | 1.44273 | 1.56572  | 0.00000 | -0.00478 | 1.53963 | 1.46187  | 1.46785 | 1.55697  |
| 4 | 1.55568 | 1.42805  | 0.01622 | 0.00000  | 1.46282 | 1.53809  | 1.53404 | 1.44625  |
| 5 | 1.41077 | 1.58503  | 1.59846 | 1.39451  | 0.00000 | -0.00161 | 1.49787 | 1.50804  |
| 6 | 1.57877 | 1.40450  | 1.39751 | 1.59934  | 0.01755 | 0.00000  | 1.50273 | 1.49140  |
| 7 | 1.04381 | 1.84219  | 1.53969 | 1.45680  | 1.53302 | 1.46447  | 0.00000 | -0.34233 |
| 8 | 1.84306 | 1.04934  | 1.43967 | 1.54941  | 1.46065 | 1.53785  | 0.12002 | 0.00000  |

### SPIN COUPLING COEFFICIENTS - KOTANI BASIS

1 ==> 0.0343  
2 ==> -0.1608  
3 ==> 0.1168  
4 ==> 0.0104  
5 ==> 0.1264  
6 ==> -0.0429  
7 ==> -0.0219  
8 ==> 0.0276  
9 ==> 0.0134  
10 ==> -0.0392  
11 ==> 0.0273  
12 ==> 0.0555  
13 ==> -0.0326  
14 ==> -0.9662

KOTANI populations, i. e.,

OCCUPATION NUMBER THAT NORMALIZE THE TOTAL SPIN FUNCTIONS

1 ==> 0.0012  
2 ==> 0.0259  
3 ==> 0.0136  
4 ==> 0.0001  
5 ==> 0.0160  
6 ==> 0.0018  
7 ==> 0.0005  
8 ==> 0.0008  
9 ==> 0.0002  
10 ==> 0.0015  
11 ==> 0.0007  
12 ==> 0.0031  
13 ==> 0.0011  
14 ==> 0.9336

**SC(8) calculation using localised CASSCF MOs as starting orbitals under the following constraint: SC orbitals 7 and 8 (see figure below) are not allowed to mix with the twelfth orbital of the localised CASSCF guess (see second figure of this Supplementary Material)**

HF energy                -147.8491272  
SC(8) energy            -147.9398337

ORBITALS

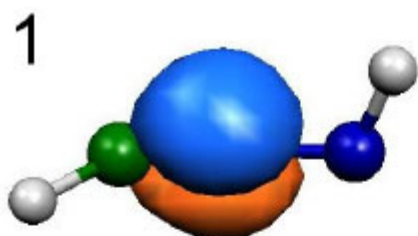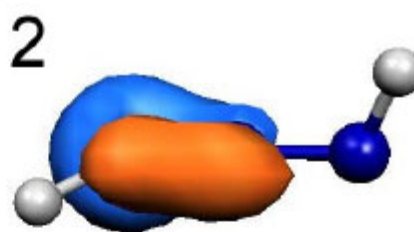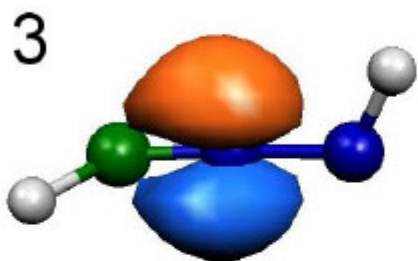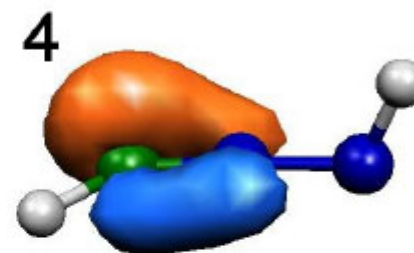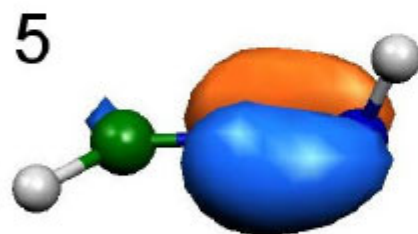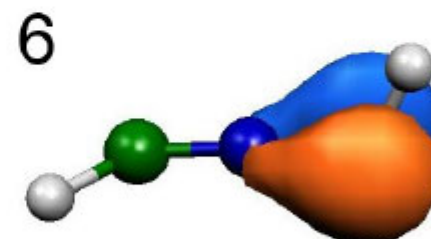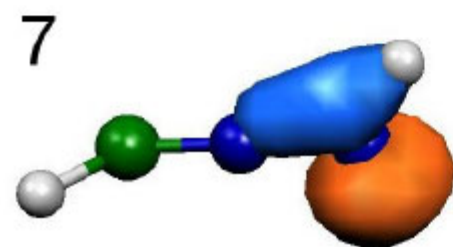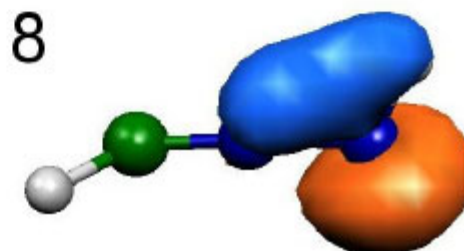

### RUMER structures

```
1 ==> 1- 2  3- 4  5- 6  7- 8
2 ==> 2- 3  1- 4  5- 6  7- 8
3 ==> 1- 2  4- 5  3- 6  7- 8
4 ==> 2- 3  4- 5  1- 6  7- 8
5 ==> 3- 4  2- 5  1- 6  7- 8
6 ==> 1- 2  3- 4  6- 7  5- 8
7 ==> 2- 3  1- 4  6- 7  5- 8
8 ==> 1- 2  4- 5  6- 7  3- 8
9 ==> 2- 3  4- 5  6- 7  1- 8
10 ==> 3- 4  2- 5  6- 7  1- 8
11 ==> 1- 2  5- 6  4- 7  3- 8
12 ==> 2- 3  5- 6  4- 7  1- 8
13 ==> 3- 4  5- 6  2- 7  1- 8
14 ==> 4- 5  3- 6  2- 7  1- 8
```

### OVERLAP matrix

|   | 1        | 2        | 3        | 4        | 5        | 6        | 7        | 8        |
|---|----------|----------|----------|----------|----------|----------|----------|----------|
| 1 | 1.00000  | -0.46510 | -0.68171 | 0.08053  | 0.28182  | -0.14858 | 0.25636  | 0.37828  |
| 2 | -0.46510 | 1.00000  | -0.09504 | -0.72725 | -0.29146 | 0.34641  | -0.02307 | 0.00365  |
| 3 | -0.68171 | -0.09504 | 1.00000  | 0.47953  | 0.28665  | -0.15686 | -0.26104 | -0.38540 |
| 4 | 0.08053  | -0.72725 | 0.47953  | 1.00000  | 0.28805  | -0.34389 | -0.04748 | -0.02768 |
| 5 | 0.28182  | -0.29146 | 0.28665  | 0.28805  | 1.00000  | -0.73644 | -0.00209 | -0.00666 |
| 6 | -0.14858 | 0.34641  | -0.15686 | -0.34389 | -0.73644 | 1.00000  | -0.00238 | -0.00031 |
| 7 | 0.25636  | -0.02307 | -0.26104 | -0.04748 | -0.00209 | -0.00238 | 1.00000  | 0.86343  |
| 8 | 0.37828  | 0.00365  | -0.38540 | -0.02768 | -0.00666 | -0.00031 | 0.86343  | 1.00000  |

### SPIN COUPLING COEFFICIENTS - RUMER BASIS

```
1 ==> 0.214066
2 ==> 0.083763
3 ==> -0.013442
4 ==> 0.009843
5 ==> -0.004586
6 ==> -0.019074
7 ==> -0.004099
8 ==> 0.008085
9 ==> -0.019766
10 ==> 0.008189
11 ==> -0.51300
12 ==> 0.008691
13 ==> -0.014807
14 ==> 0.193159
```

### CHIRGWIN-COULSON occupation numbers

```
Chirgwin-Coulson occupation number for structure 1 is 1.15227
Chirgwin-Coulson occupation number for structure 2 is -0.04555
Chirgwin-Coulson occupation number for structure 3 is -0.03346
Chirgwin-Coulson occupation number for structure 4 is -0.00467
Chirgwin-Coulson occupation number for structure 5 is -0.01138
Chirgwin-Coulson occupation number for structure 6 is -0.05085
Chirgwin-Coulson occupation number for structure 7 is 0.00111
Chirgwin-Coulson occupation number for structure 8 is 0.01017
Chirgwin-Coulson occupation number for structure 9 is 0.00420
Chirgwin-Coulson occupation number for structure 10 is 0.01025
Chirgwin-Coulson occupation number for structure 11 is -0.01408
Chirgwin-Coulson occupation number for structure 12 is -0.00194
Chirgwin-Coulson occupation number for structure 13 is -0.04058
Chirgwin-Coulson occupation number for structure 14 is 0.02451
```

### Expectation values of $(s(i)+s(j))^*2$

Lower triangle uses SPIN function with Snorm=0.916976

Upper triangle uses FULL function with Snorm=1.000000

|   | 1       | 2        | 3       | 4        | 5       | 6       | 7       | 8       |
|---|---------|----------|---------|----------|---------|---------|---------|---------|
| 1 | 0.00000 | -0.55706 | 1.35736 | 2.19940  | 1.43933 | 1.56066 | 1.51261 | 1.48770 |
| 2 | 0.18302 | 0.00000  | 2.19949 | 1.35736  | 1.56148 | 1.43841 | 1.49139 | 1.50893 |
| 3 | 1.90547 | 0.91718  | 0.00000 | -0.55738 | 1.44435 | 1.55597 | 1.50961 | 1.49060 |
| 4 | 0.91729 | 1.90547  | 0.18302 | 0.00000  | 1.55520 | 1.44499 | 1.48774 | 1.51269 |
| 5 | 1.49671 | 1.50065  | 1.50002 | 1.49682  | 0.00000 | 0.00061 | 1.44063 | 1.55840 |
| 6 | 1.50170 | 1.49528  | 1.49842 | 1.49909  | 0.01258 | 0.00000 | 1.55785 | 1.44152 |
| 7 | 1.48565 | 1.50901  | 1.48771 | 1.51183  | 1.38246 | 1.61061 | 0.00000 | 0.00016 |
| 8 | 1.51016 | 1.48939  | 1.50818 | 1.48647  | 1.61076 | 1.38232 | 0.01273 | 0.00000 |

### SPIN COUPLING COEFFICIENTS - KOTANI BASIS

1 ==> -0.0432  
2 ==> -0.0007  
3 ==> 0.0029  
4 ==> -0.0022  
5 ==> 0.0041  
6 ==> -0.0058  
7 ==> 0.0070  
8 ==> 0.0227  
9 ==> -0.0622  
10 ==> -0.0014  
11 ==> 0.0011  
12 ==> 0.0008  
13 ==> 0.2984  
14 ==> -0.9511

KOTANI populations, i. e.,

### OCCUPATION NUMBER THAT NORMALIZE THE TOTAL SPIN FUNCTIONS

1 ==> 0.0019  
2 ==> 0.0000  
3 ==> 0.0000  
4 ==> 0.0000  
5 ==> 0.0000  
6 ==> 0.0000  
7 ==> 0.0000  
8 ==> 0.0005  
9 ==> 0.0039  
10 ==> 0.0000  
11 ==> 0.0000  
12 ==> 0.0000  
13 ==> 0.0891  
14 ==> 0.9046
